# Supplementary material
Source: publisher figshare collection journal article supplement (https://gsapubs.figshare.com/ndownloader/files/23296178)
Supplement: Supplementary file 1 [file 23296178]

Table DR1: Compositions and references from Figure 1. Possible parental magma compositions highlighted in bold<sup>1</sup>:

|                      | sample                        | SiO <sub>2</sub> | FeO          | Th            |
|----------------------|-------------------------------|------------------|--------------|---------------|
| Lherzolithic         | ALH 77005 <sup>2</sup>        | 42.4             | 20.1         | 0.057         |
|                      | LEW8 8516 <sup>2</sup>        | 46.0             | 19.0         | 0.037         |
|                      | Yamato 793605 <sup>2</sup>    | 45.4             | 19.7         | 0.06          |
|                      | GRV 99027 <sup>3</sup>        | 43.3             | 19.2         | 0.031         |
|                      | NWA 1950 <sup>4</sup>         | 44.0             | 21.7         | 0.083         |
|                      | RBT 04262 <sup>5</sup>        | 47.6             | 20.6         | 0.247         |
|                      |                               |                  |              |               |
| Basaltic             | EETA 79001B <sup>2</sup>      | 49.4             | 17.4         | 0.145         |
|                      | Shergotty <sup>2</sup>        | 51.3             | 19.4         | 0.38          |
|                      | QUE 94201 <sup>2</sup>        | 47.9             | 18.5         | 0.05          |
|                      | Zagami <sup>2,6</sup>         | 50.5             | 18.1         | 0.37          |
|                      | Los Angeles <sup>7</sup>      | 49.1             | 21.2         | 0.7           |
|                      | Dhofar 378 <sup>8</sup>       | 49.9             | 19.9         | 0.3           |
|                      |                               |                  |              |               |
| Olivine-phyric       | NWA 1068 <sup>9</sup>         | 46               | 20.48        | 0.409         |
|                      | Dhofar 019 <sup>9</sup>       | 49.2             | 18.4         | 0.04          |
|                      | DaG 476 <sup>9</sup>          | 45.76            | 16.06        | 0.011         |
|                      | DaG 489 <sup>9</sup>          | 47.72            | 16.52        | 0.02          |
|                      | SaU 005 <sup>9</sup>          | 47.2             | 18.34        | 0.012         |
|                      | <b>Y-980459<sup>10</sup></b>  | <b>49.9</b>      | <b>17.3</b>  | <b>0.0213</b> |
|                      | EETA79001A <sup>2,9</sup>     | 49.9             | 18.4         | 0.08          |
|                      | <b>LAR 06319<sup>11</sup></b> | <b>46.7</b>      | <b>20.4</b>  | <b>0.26</b>   |
|                      | NWA5990                       | 42.3             | 22.1         |               |
|                      | <b>NWA 5789<sup>12</sup></b>  | <b>48.57</b>     | <b>17.56</b> |               |
|                      | <b>NWA 2990<sup>13</sup></b>  | <b>51.08</b>     | <b>16.42</b> | <b>0.27</b>   |
|                      |                               |                  |              |               |
| Bounce <sup>14</sup> |                               | 51.6             | 14.4         |               |

Candidate parental magma compositions taken from relevant literature. Filiberto and Dasgupta (2011) identified three possible parental magma compositions directly from whole rocks, for Yamato 980459, NWA 5789, and NWA 2990. LAR 06319 composition was defined by Filiberto and Dasgupta as having accumulated olivine relative to parental magma composition. Balta et al. (2013) combined the whole rock composition and an olivine addition and mixing calculation to produce an estimated parental melt composition<sup>15</sup>. That composition was very similar to the composition of a melt inclusion from the same sample reported by Basu Sarbadhikari et al. (2011) and therefore is judged to be a 4<sup>th</sup> practical parental melt composition<sup>16</sup>.

Table 1 and Figure 2 include two other proposed liquid compositions. NWA 1068 is not a liquid composition, but Filiberto et al. (2010) present a reconstructed parental composition for that magma as well<sup>17</sup>, and that composition was used in the calculations of olivine-orthopyroxene equilibria. Finally, McSween et al. (2006) and Monders et al. (2007) argued that a Gusev basalt composition could represent a reasonable primary melt of a fertile martian mantle and the experimentally synthesized composition from Monders et al. (2007) was used in additional calculations<sup>18-19</sup>. We also note here that our calculations found a slightly higher pressure for olivine-orthopyroxene cosaturation than was found experimentally by Monders et al. (2007), possibly suggesting that the silica activity is also being slightly underestimated by pMELTS.

Figure 1 contains measured whole rock compositions, so only measured rocks (rather than reconstructed compositions) are displayed in Figure 1. Figure 1(a) has 4 proposed parental magma points while 1(b) only has 3 as there is no Th composition measurement for any of the Gusev rocks.

- 1 Filiberto, J. & Dasgupta, R. Fe<sup>2+</sup>-Mg partitioning between olivine and basaltic melts: Applications to genesis of olivine-phyric shergottites and conditions of melting in the Martian interior. *Earth and Planetary Science Letters* **304**, 527-537 (2011).
- 2 Lodders, K. A survey of shergottite, nakhlite and chassigny meteorites whole-rock compositions. *Meteoritics & Planetary Science* **33**, A183-A190, doi:10.1111/j.1945-5100.1998.tb01331.x (1998).
- 3 Lin, Y., Qi, L., Wang, G. & Xu, L. Bulk chemical composition of Iherzolitic shergottite Grove Mountains 99027—Constraints on the mantle of Mars. *Meteoritics & Planetary Science* **43**, 1179-1187, doi:10.1111/j.1945-5100.2008.tb01121.x (2008).
- 4 Gillet, P. *et al.* Petrology, geochemistry, and cosmic-ray exposure age of Iherzolitic shergottite Northwest Africa 1950. *Meteoritics & Planetary Science* **40**, 1175-1184, doi:10.1111/j.1945-5100.2005.tb00182.x (2005).
- 5 Anand, M. *et al.* Mineralogy and Geochemistry of Shergottite RBT 04262. *39th Lunar and Planetary Science Conference Abs.* 2173 (2008).
- 6 Barrat, J. A., Blichert-Toft, J., Nesbitt, R. W. & Keller, F. Bulk chemistry of Saharan shergottite Dar al Gani 476. *Meteoritics & Planetary Science* **36**, 23-29, doi:10.1111/j.1945-5100.2001.tb01807.x (2001).
- 7 Rubin, A. E. *et al.* Los Angeles: The most differentiated basaltic martian meteorite. *Geology* **28**, 1011-1014, doi:10.1130/0091-7613(2000)28<1011:latmdb>2.0.co;2 (2000).
- 8 Ikeda, Y. *et al.* Petrology of a new basaltic shergottite: Dhofar 378. *Antarctic Meteorite Research* **19**, 20-44 (2006).
- 9 Barrat, J. A. *et al.* Petrology and chemistry of the Picritic Shergottite North West Africa 1068 (NWA 1068). *Geochimica et Cosmochimica Acta* **66**, 3505-3518 (2002).
- 10 Shirai, N. & Ebihara, M. Chemical characteristics of a Martian meteorite, Yamato 980459. *Antarctic Meteorite Research* **17**, 55-67 (2004).
- 11 Basu Sarbadhikari, A., Day, J. M. D., Liu, Y., Rumble Iii, D. & Taylor, L. A. Petrogenesis of olivine-phyric shergottite Larkman Nunatak 06319: Implications for enriched components in martian basalts. *Geochimica et Cosmochimica Acta* **73**, 2190-2214 (2009).
- 12 Irving, A. J. *et al.* Petrologic, elemental and multi-isotopic characterization of permafic olivine-phyric shergottite Northwest Africa 5789: A primitive magma derived from

- depleted Martian mantle *41st Lunar and Planetary Science Conference*, Abstract 1547 (2010).
- 13 Bunch, T. *et al.* Petrology and composition of Northwest Africa 2990: a new type of fine-grained, enriched, olivine-phyric shergottite. *40th Lunar and Planetary Science Conference*, Abstract 2274 (2009).
  - 14 Zipfel, J. *et al.* Bounce Rock—A shergottite-like basalt encountered at Meridiani Planum, Mars. *Meteoritics & Planetary Science* **46**, 1-20, doi:10.1111/j.1945-5100.2010.01127.x (2011).
  - 15 Balta, J. B., Sanborn, M. E., Y., M. H. & Wadhwa, M. Magmatic history and parental melt composition of olivine-phyric shergottite LAR 06319: Importance of magmatic degassing and olivine antecrysts in martian magmatism. *Meteoritics and Planetary Science* **In Press** (2013).
  - 16 Basu Sarbadhikari, A., Goodrich, C. A., Liu, Y., Day, J. M. D. & Taylor, L. A. Evidence for heterogeneous enriched shergottite mantle sources in Mars from olivine-hosted melt inclusions in Larkman Nunatak 06319. *Geochimica et Cosmochimica Acta* **75**, 6803-6820 (2011).
  - 17 Filiberto, J. *et al.* Experimental petrology, crystallization history, and parental magma characteristics of olivine-phyric shergottite NWA 1068: Implications for the petrogenesis of “enriched” olivine-phyric shergottites. *Meteoritics & Planetary Science* **45**, 1258-1270, doi:10.1111/j.1945-5100.2010.01080.x (2010).
  - 18 McSween, H. Y. *et al.* Characterization and petrologic interpretation of olivine-rich basalts at Gusev Crater, Mars. *J. Geophys. Res.* **111**, E02S10, doi:10.1029/2005je002477 (2006).
  - 19 Monders, A. G., Médard, E. & Grove, T. L. Phase equilibrium investigations of the Adirondack class basalts from the Gusev plains, Gusev crater, Mars. *Meteoritics & Planetary Science* **42**, 131-148, doi:10.1111/j.1945-5100.2007.tb00222.x (2007).
